# Supplementary material for: The effect of fibers on coagulation of casein-based enteral nutrition in an artificial gastric digestion model
Source: Royal Society of Chemistry journal article supplement (doi:10.1039/c4fo00061g), 2014-01-01

### FIGURE 6A. Protein content acacia fiber

Mean protein content of the coagulate fractions of particles larger than 2 mm, between 1 and 2 mm, and between 0.25 and 1 mm, with increasing concentrations of acacia fiber. The addition of increasing concentrations of acacia fiber to enteral nutrition had no significant effect on the coagulation fractions of particle larger than 2 mm (slope -0.03 L, ns).

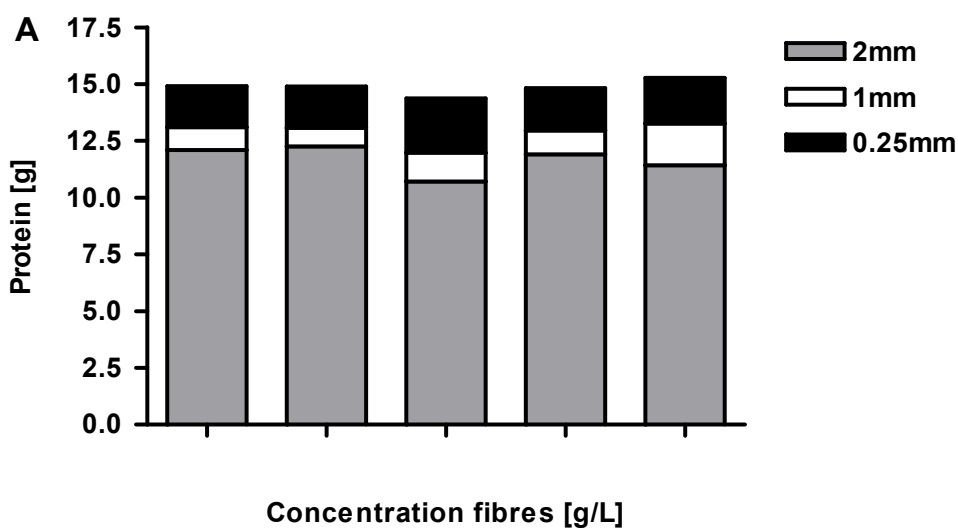

**FIGURE 6B. Protein content oligofructose**

Mean protein content of the coagulate fractions of particles larger than 2 mm, between 1 and 2 mm, and between 0.25 and 1 mm, with increasing concentrations of oligofructose. The addition of increasing concentrations of oligofructose to enteral nutrition had no significant effect on the coagulation fractions of particle larger than 2 mm (slope -0.04 L, ns).

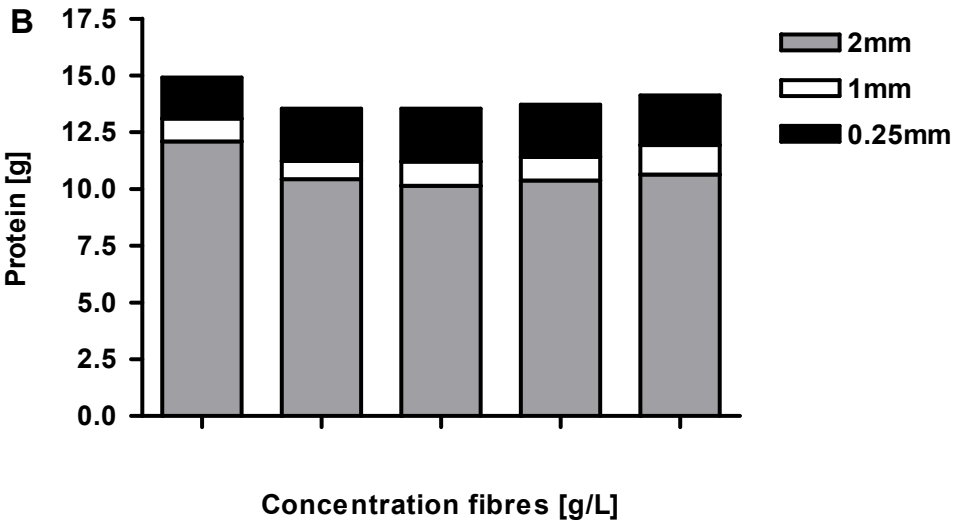

### FIGURE 6C. Protein content inulin

Mean protein content of the coagulate fractions of particles larger than 2 mm, between 1 and 2 mm, and between 0.25 and 1 mm, with increasing concentrations of inulin. The addition of increasing concentrations of inulin to enteral nutrition had no significant effect on the coagulation fractions of particle larger than 2 mm (slope -0.04 L, ns).

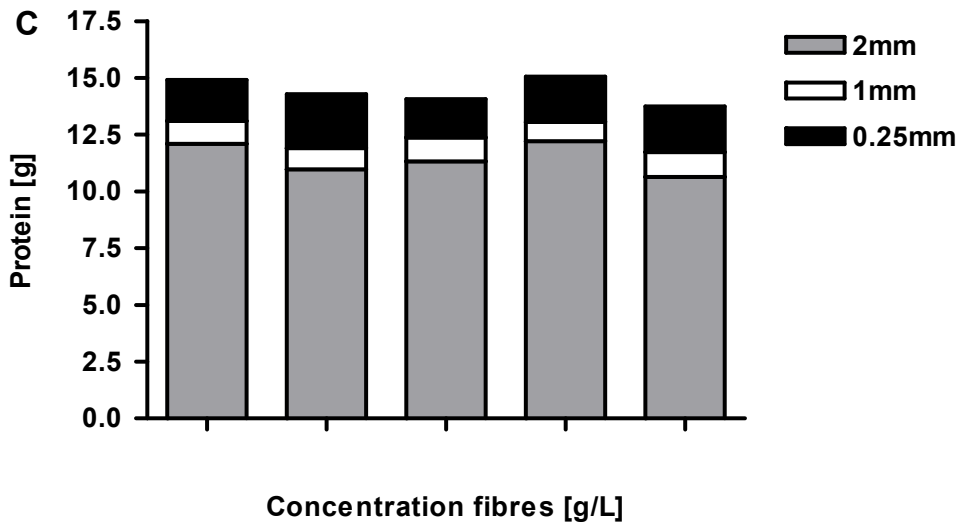

### FIGURE 6D. Protein content soy polysaccharide

Mean protein content of the coagulate fractions of particles larger than 2 mm, between 1 and 2 mm, and between 0.25 and 1 mm, with increasing concentrations of soy polysaccharide. The addition of increasing concentrations of soy polysaccharide to enteral nutrition resulted in a significant decrease of the protein content of the particles larger than 2 mm (slope -0.70 L,  $P < 0.05$ ).

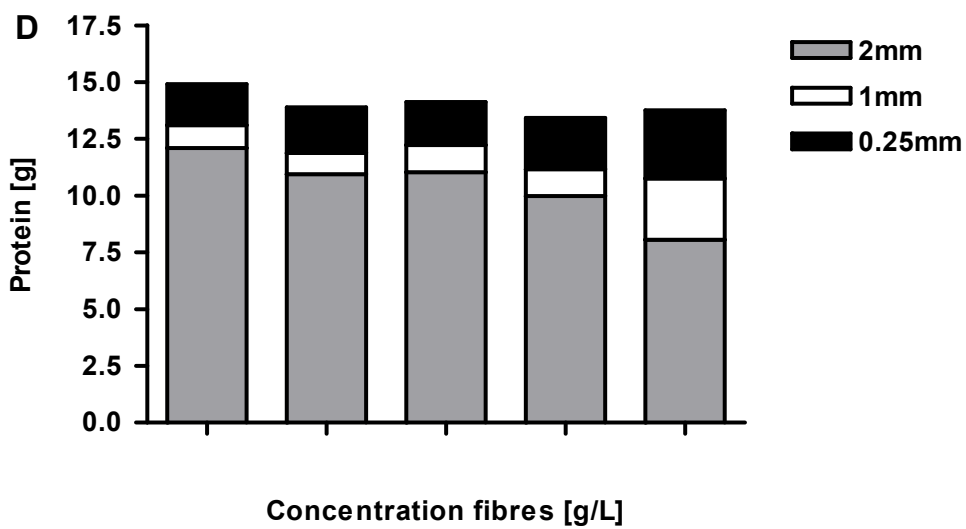

### FIGURE 6E. Protein content resistant starch

Mean protein content of the coagulate fractions of particles larger than 2 mm, between 1 and 2 mm, and between 0.25 and 1 mm, with increasing concentrations of resistant starch. The addition of increasing concentrations of resistant starch to enteral nutrition resulted in a significant decrease of the protein content of the particles larger than 2 mm (slope -0.42 L,  $P < 0.05$ ).

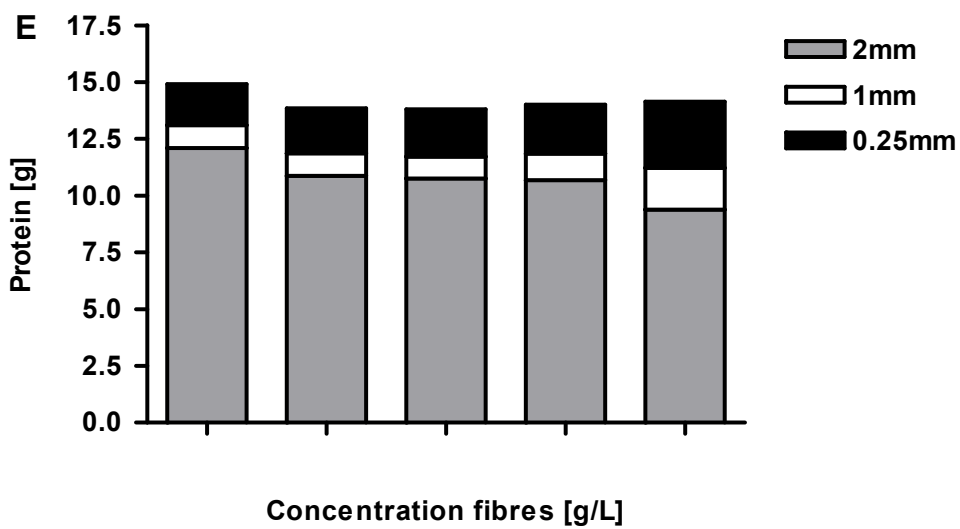

### FIGURE 6F. Protein content alpha cellulose

Mean protein content of the coagulate fractions of particles larger than 2 mm, between 1 and 2 mm, and between 0.25 and 1 mm, with increasing concentrations of alpha cellulose. The addition of increasing concentrations of alpha cellulose to enteral nutrition resulted in a significant decrease of the protein content of the particles larger than 2 mm (slope -0.13 L,  $P < 0.05$ ).

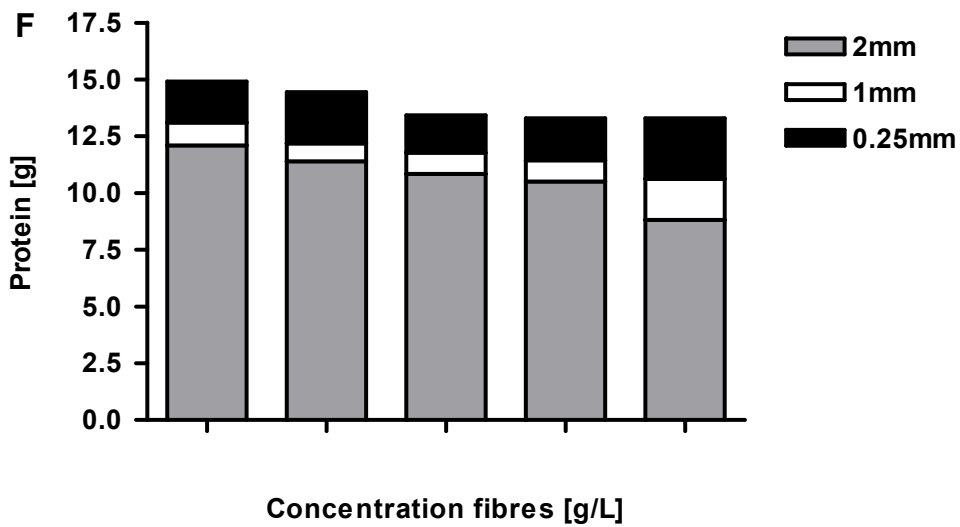

Supplement: c4fo00061g3.pdf [file c4fo00061g3.pdf]
